# Supplementary material for: Nanocups-on-microtubes: a unique host towards high-performance lithium ion batteries
Source: Royal Society of Chemistry journal article supplement (doi:10.1039/c4ta02813a), 2014-01-01
Supplement: c4ta02813a1.pdf [file c4ta02813a1.pdf]

## Nanocups-on-Microtubes: a Unique Host Towards High-Performance Lithium Ion Batteries

*Junhua Kong,<sup>a, #</sup> Chenyang Zhao,<sup>a, #</sup> Yuefan Wei,<sup>b</sup> Si Lei Phua,<sup>a</sup> Yuliang Dong,<sup>a</sup> Xuehong*

*Lu<sup>a, \*</sup>*

<sup>a</sup> School of Materials Science and Engineering, Nanyang Technological University, 50 Nanyang Avenue, Singapore 639798

<sup>b</sup> School of Mechanical and Aerospace Engineering, Nanyang Technological University, 50 Nanyang Avenue, Singapore 639798

\* E-mail: [asxhlu@ntu.edu.sg](mailto:asxhlu@ntu.edu.sg)

# denotes equal contribution

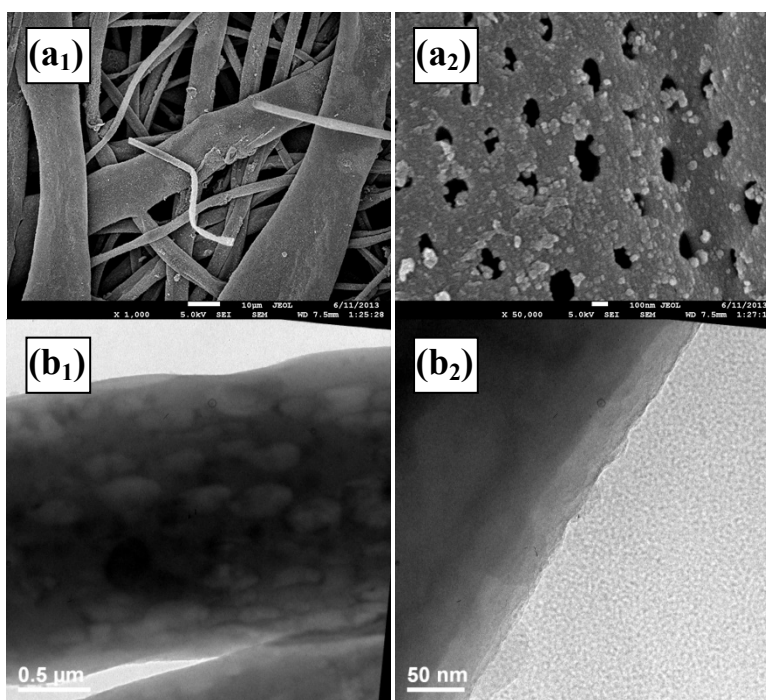

**Fig. S1.** (a<sub>1</sub> and a<sub>2</sub>) FESEM and (b<sub>1</sub> and b<sub>2</sub>) TEM images of polydopamine (PDA)-coated PS porous nanofibers, showing the fibrous morphology as well as the successful coating.

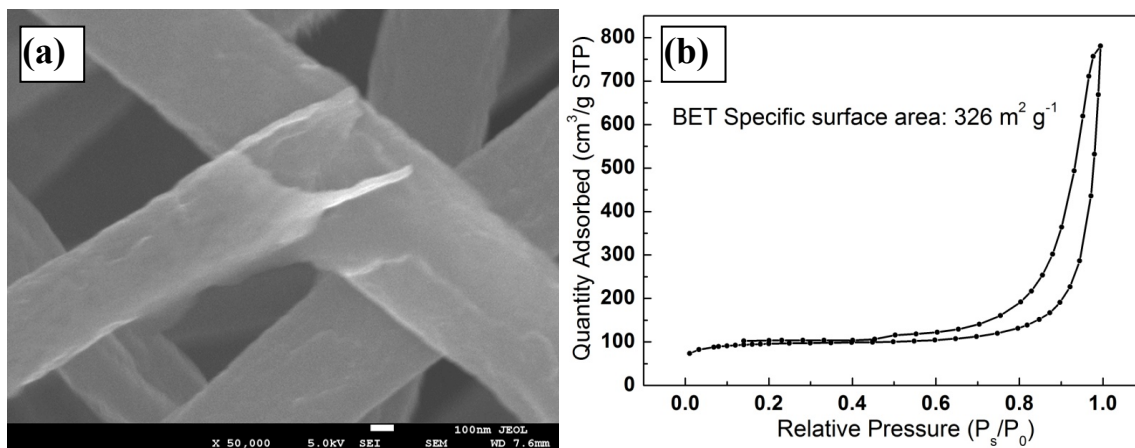

**Fig. S2.** (a) The morphology and (b) Brunauer-Emmett-Teller (BET) isotherm curve of the C-PDA hollow nanofibers, indicating the BET specific area of about 326 m<sup>2</sup> g<sup>-1</sup>. The C-PDA hollow nanofibers were prepared through coating PDA onto solid PS nanofibers followed by annealing. The coating and annealing condition was the same as that used to obtain C-PDA nanocups.
